# Supplementary material for: Nondestructive up-conversion readout in Er/Yb co-doped Na0.5Bi2.5Nb2O9-based optical storage materials for optical data storage device applications
Source: Royal Society of Chemistry journal article supplement (doi:10.1039/c7tc00582b), 2017-01-01
Supplement: c7tc00582b1.pdf [file c7tc00582b1.pdf]

## Supporting Information

# **Nondestructive up-conversion readout in Er/Yb co-doped $\text{Na}_{0.5}\text{Bi}_{2.5}\text{Nb}_2\text{O}_9$ -based optical storage materials for optical data storage device applications**

Qiwei Zhang,<sup>a</sup> Shuangshuang Yue,<sup>a</sup> Haiqin Sun,<sup>\*a</sup> Xusheng Wang,<sup>b</sup> Xihong Hao<sup>a</sup> and Shengli An<sup>a</sup>

<sup>a</sup> Inner Mongolia Key Laboratory of Ferroelectric-related New Energy Materials and Devices, School of Materials and Metallurgy, Inner Mongolia University of Science and Technology, 7# Arding Street, Kun District, Baotou 014010, China

<sup>b</sup> Functional Materials Research Laboratory, School of Materials Science and Engineering, Tongji University, 4800 Caoyang Road, Shanghai 201804, China

\*E-mail: a8082sz@imust.edu.cn

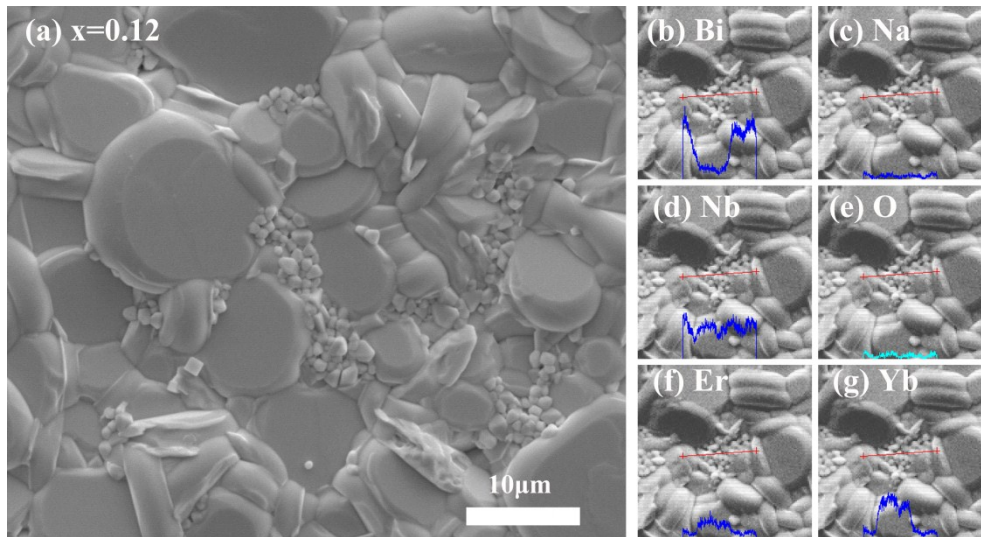

**Fig. S1** SEM image and line scanning results of different elements for the ceramic sample

( $x=0.12$ ).

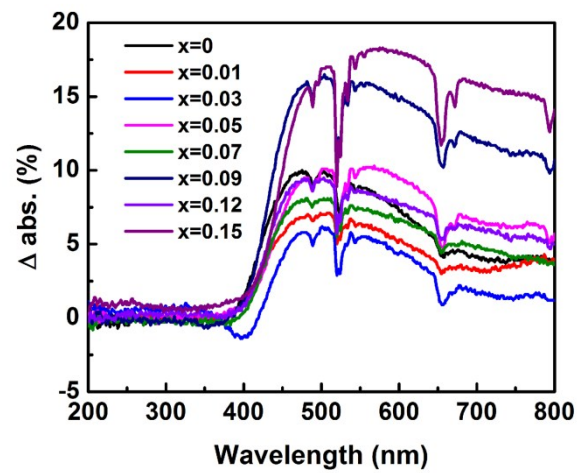

**Fig. S2** The difference ( $\Delta \text{abs.}$ ) between reflectance ratios of NBEN: $x$ Yb samples before and after 407 nm light irradiation (LD, 200 mW).

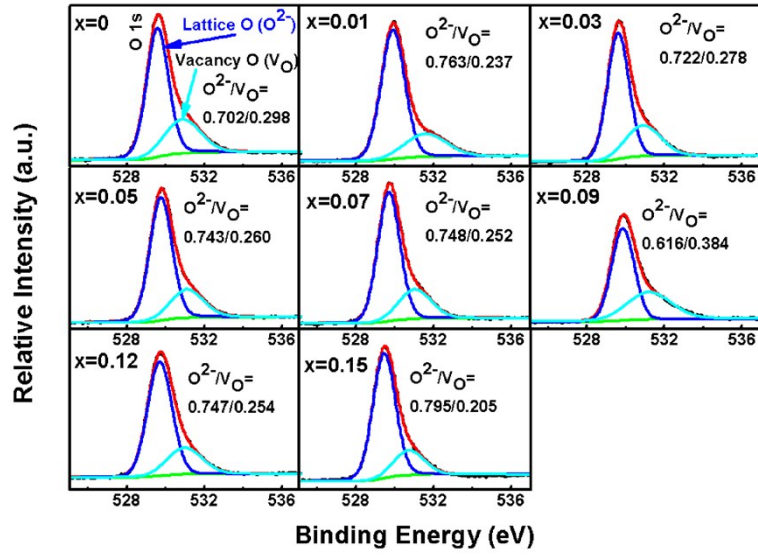

Fig. S3 O 1s XPS spectra and fitting data of NBN-based ceramic samples with different Yb<sup>3+</sup> concentrations

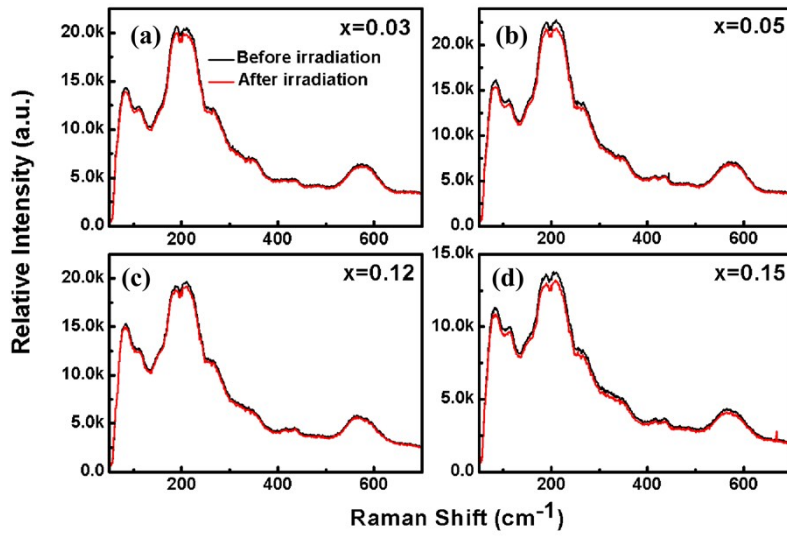

Fig. S4 Raman spectra of NBN:xYb (x=0.03, 0.05, 0.12, and 0.15) samples before and after 407 nm light irradiation (LD, 200 mW) for 10 s.

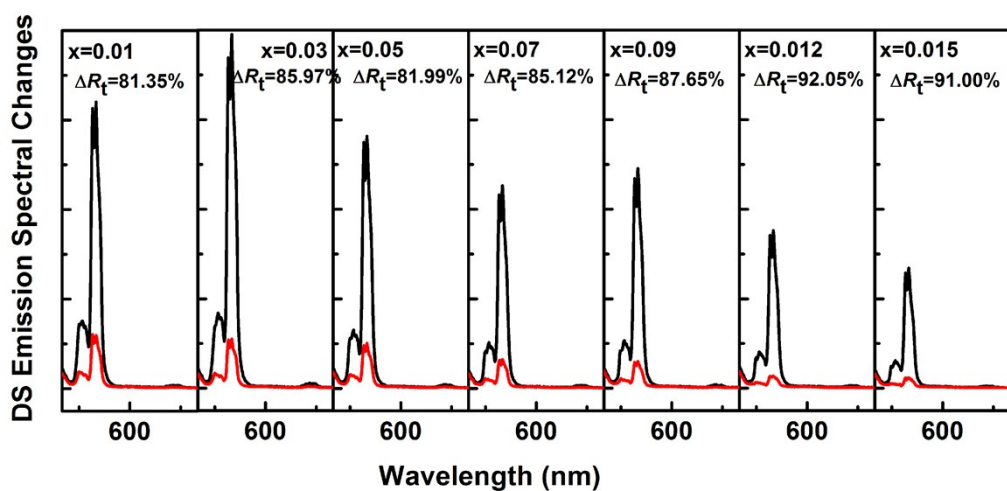

Fig. S5 DS emission spectra ( $\lambda_{\text{ex}}=487$  nm) of NBEN:xYb samples before and after 407 nm light (LD, 200 mW) irradiation for 10 s.

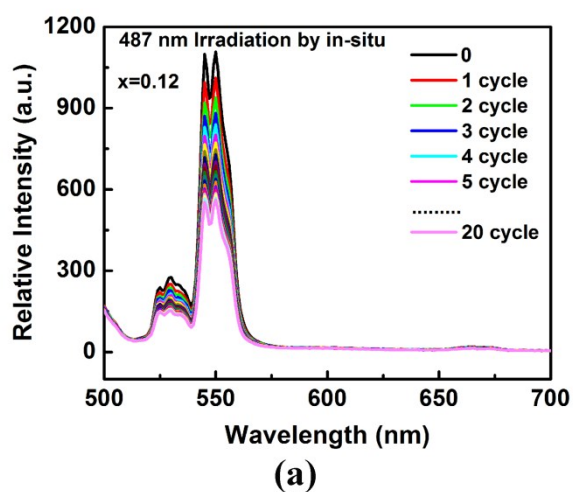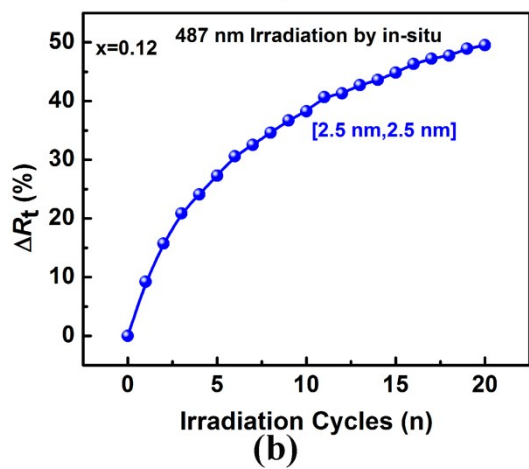

Fig. S6 (a) DS emission spectral changes of the NBEN:xYb ( $x=0.12$ ) ceramic sample excited by

487nm for different in-situ irradiation cycles. (b) The  $\Delta R_t$  values of the sample as a function of irradiation cycles (n).

**Table S1** Fitting results of Raman spectra (a) before and (b) after 407 nm light irradiation (LD, 200 mW) for all samples.

| Modes<br>( $\text{cm}^{-1}$ ) | Samples before irradiation |        |        |        |        |        |        |        |
|-------------------------------|----------------------------|--------|--------|--------|--------|--------|--------|--------|
|                               | 0                          | 0.01   | 0.03   | 0.05   | 0.07   | 0.09   | 0.12   | 0.15   |
| $\nu_1$                       | 67.21                      | 66.05  | 65.85  | 66.60  | 67.60  | 67.48  | 68.53  | 67.07  |
| $\nu_2$                       | 81.05                      | 80.11  | 80.14  | 80.71  | 81.67  | 81.67  | 82.08  | 81.02  |
| $\nu_3$                       | 107.51                     | 104.90 | 106.59 | 107.14 | 108.33 | 108.13 | 107.05 | 106.87 |
| $\nu_4$                       | 148.89                     | 147.46 | 148.77 | 148.52 | 148.89 | 148.62 | 147.94 | 147.35 |
| $\nu_5$                       | 185.00                     | 184.20 | 185.11 | 184.72 | 185.05 | 185.03 | 183.78 | 184.24 |
| $\nu_6$                       | 218.01                     | 216.61 | 218.06 | 217.97 | 218.37 | 219.34 | 216.78 | 217.39 |
| $\nu_7$                       | 262.65                     | 260.86 | 264.47 | 263.80 | 264.00 | 266.75 | 262.59 | 262.69 |
| $\nu_8$                       | 332.87                     | 330.05 | 330.87 | 329.02 | 329.83 | 325.97 | 329.44 | 327.85 |
| $\nu_9$                       | 419.68                     | 425.40 | 418.47 | 422.05 | 420.80 | 426.86 | 425.25 | 422.23 |
| $\nu_{10}$                    | 570.30                     | 570.87 | 574.13 | 572.78 | 572.32 | 576.93 | 570.53 | 569.97 |

**Table S2** The band gap energies ( $E_g$  and  $E_g^*$ ) of NBN:xHo samples before and after 407 nm light irradiation (LD, 200 mW).

| Samples      | x=0  | x=0.01 | x=0.03 | x=0.05 | x=0.07 | x=0.09 | x=0.12 | x=0.15 |
|--------------|------|--------|--------|--------|--------|--------|--------|--------|
| $E_g$ (eV)   | 3.11 | 2.95   | 2.87   | 2.84   | 3.00   | 2.87   | 3.15   | 2.65   |
| $E_g^*$ (eV) | 3.18 | 3.04   | 3.00   | 2.94   | 3.10   | 2.94   | 3.22   | 2.81   |

$E_g^*$  means the gap after irradiation
